# Supplementary material for: CircRNA GFRA1 promotes hepatocellular carcinoma progression by modulating the miR-498/NAP1L3 axis
Source: PubMed Central journal article supplement (PMC7801409; doi:10.1038/s41598-020-79321-y), 2021-01-11

**CircRNA GFRA1 promotes hepatocellular carcinoma progression by modulating the miR-498/NAP1L3 axis**

Running title: CircGFRA1 promotes HCC progression via miR-498/NAP1L3 axis

Shuai Lv<sup>1</sup>, Yingxia Li<sup>1</sup>, Hanbing Ning<sup>1</sup>, Meihui Zhang<sup>2</sup>, Qiaoyu Jia<sup>1</sup>, Xijuan Wang<sup>2\*</sup>

<sup>1</sup>Department of gastroenterology, the First Affiliated Hospital of Zhengzhou University, Zhengzhou, Henan Province, 450018, China

<sup>2</sup> Department of pediatrics, Henan Provincial People's Hospital, People's Hospital of Zhengzhou University, Zhengzhou, Henan Province, 450003, China

Correspondence author: \* Xijuan Wang, Department of pediatrics, Henan Provincial People's Hospital, People's Hospital of Zhengzhou University, No.7, Weiwu Road, Zhengzhou, Henan Province, 450003, China Tel: +86-18703874060 Email: xijuanwang126@aliyun.com

1、 Figure 3C: HCCLM3 cell: NAP1L3、 GAPDH

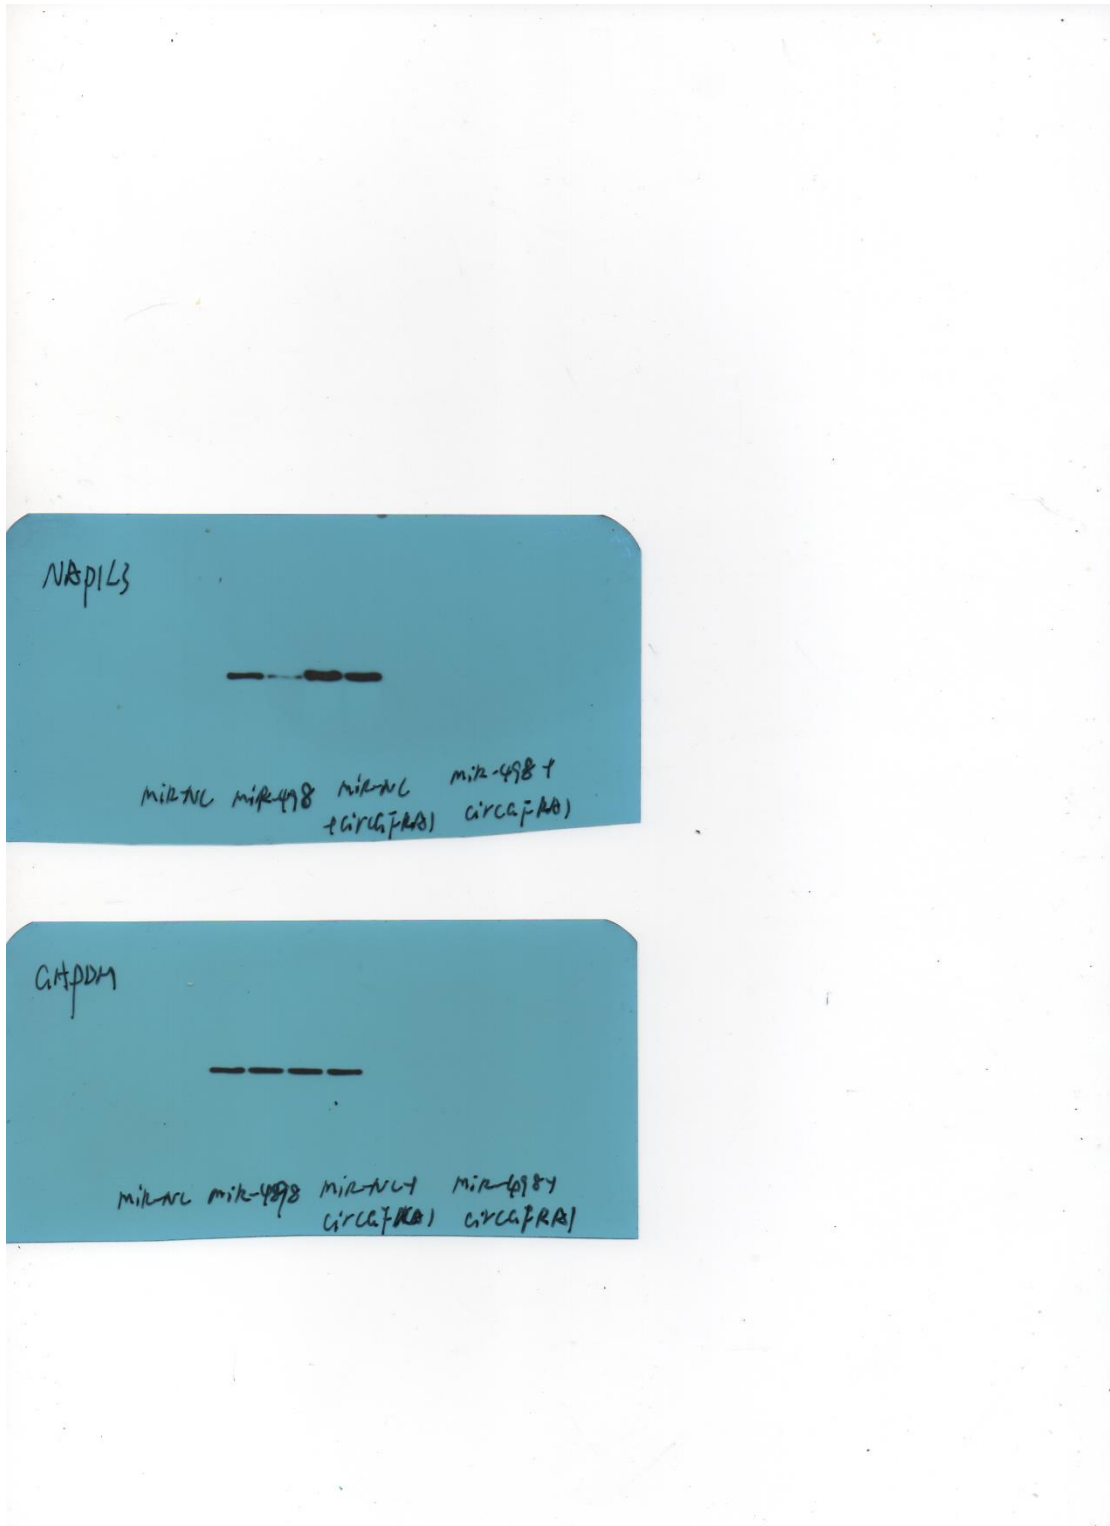

2、 Figure 3C: HEP3B cell: NAP1L3、 GAPDH

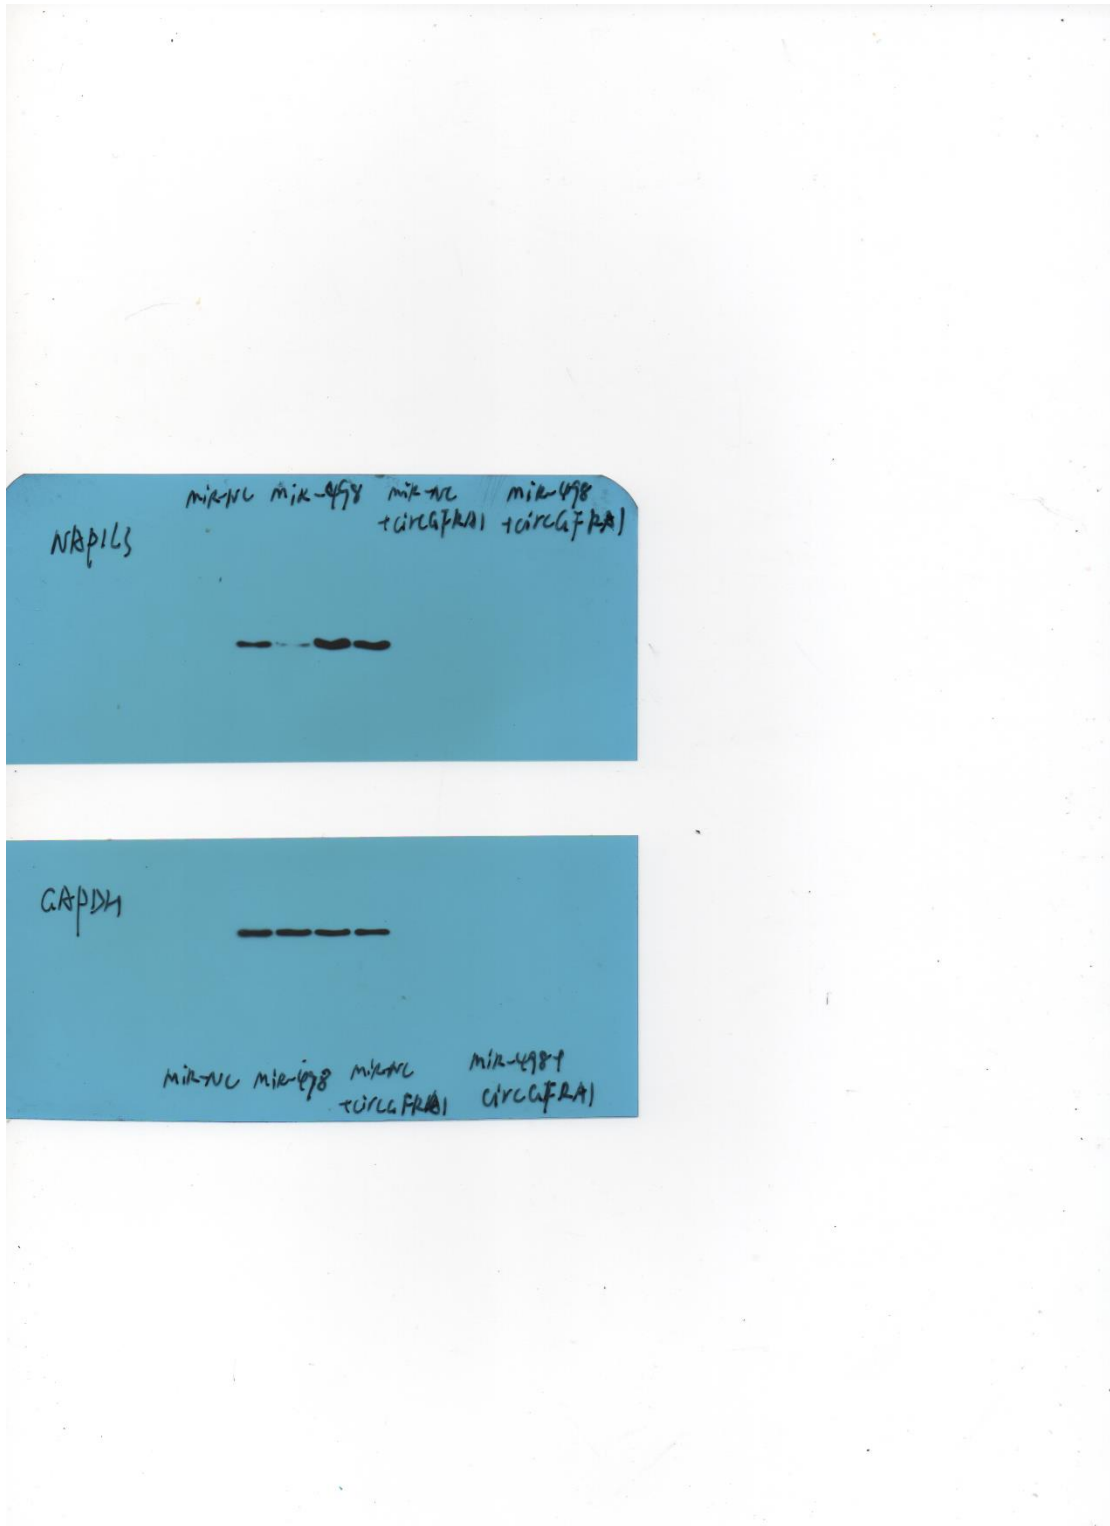

3、 Figure 3E: NAP1L3、 GAPDH

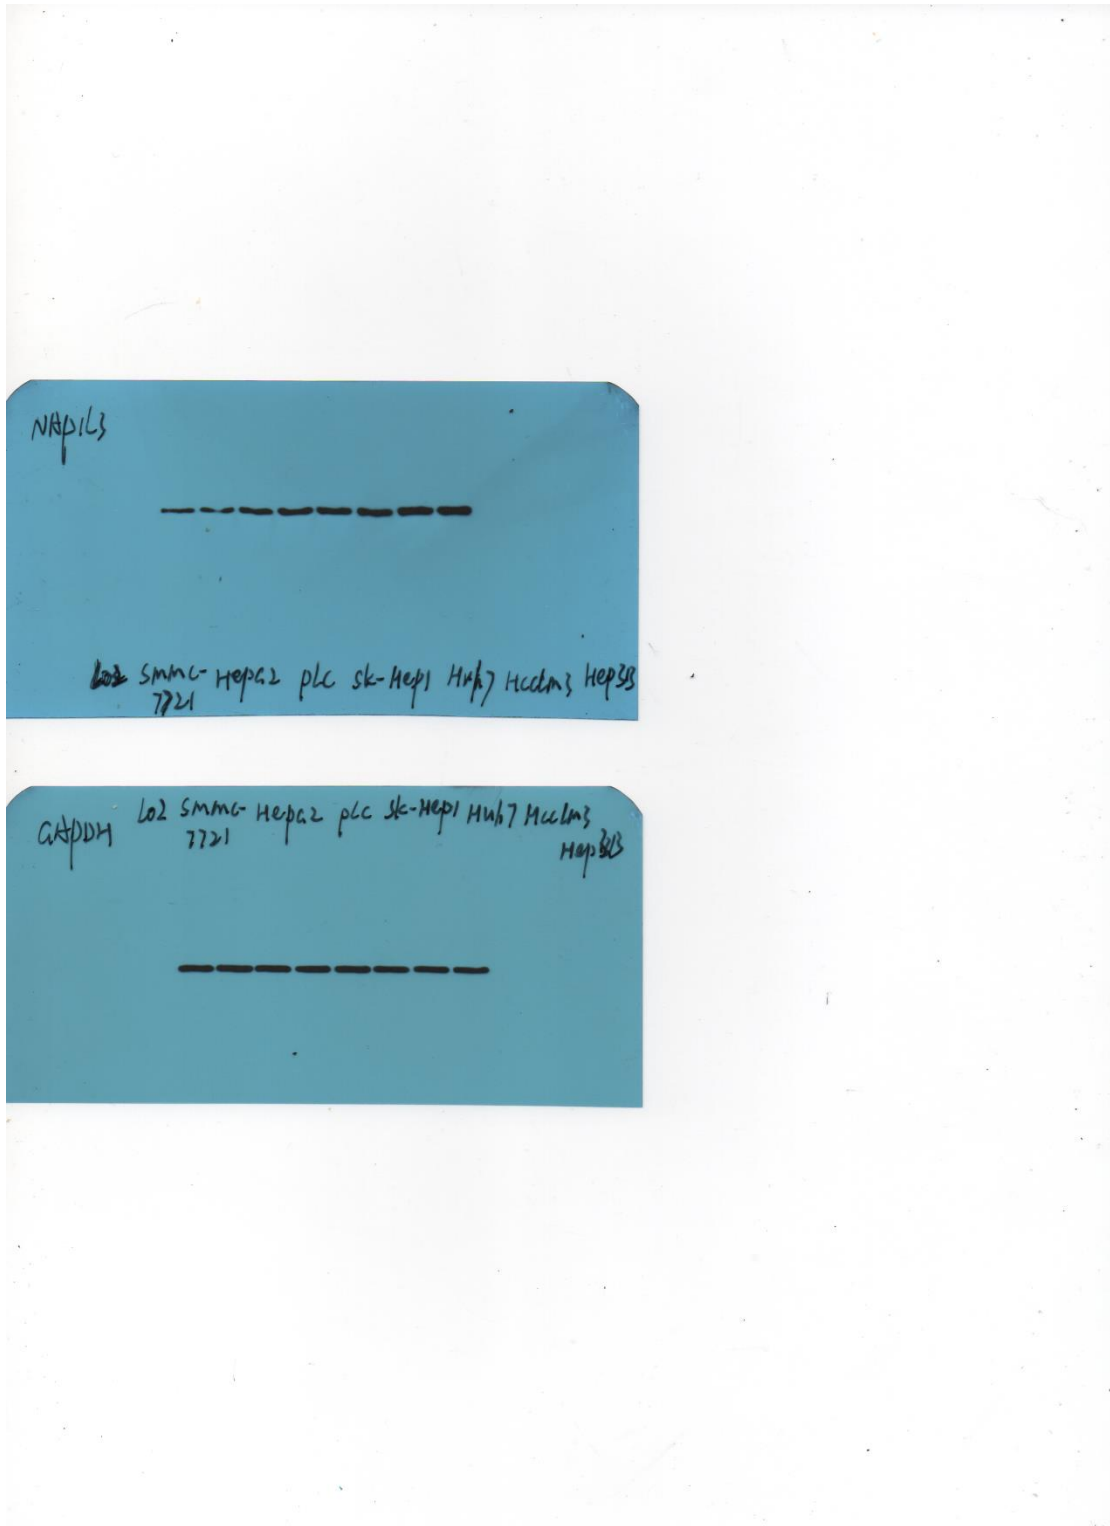

4、 Figure 5A: HCCLM3 cell: c-Myc、cyclin D1、MMP-2、MMP-9、GAPDH

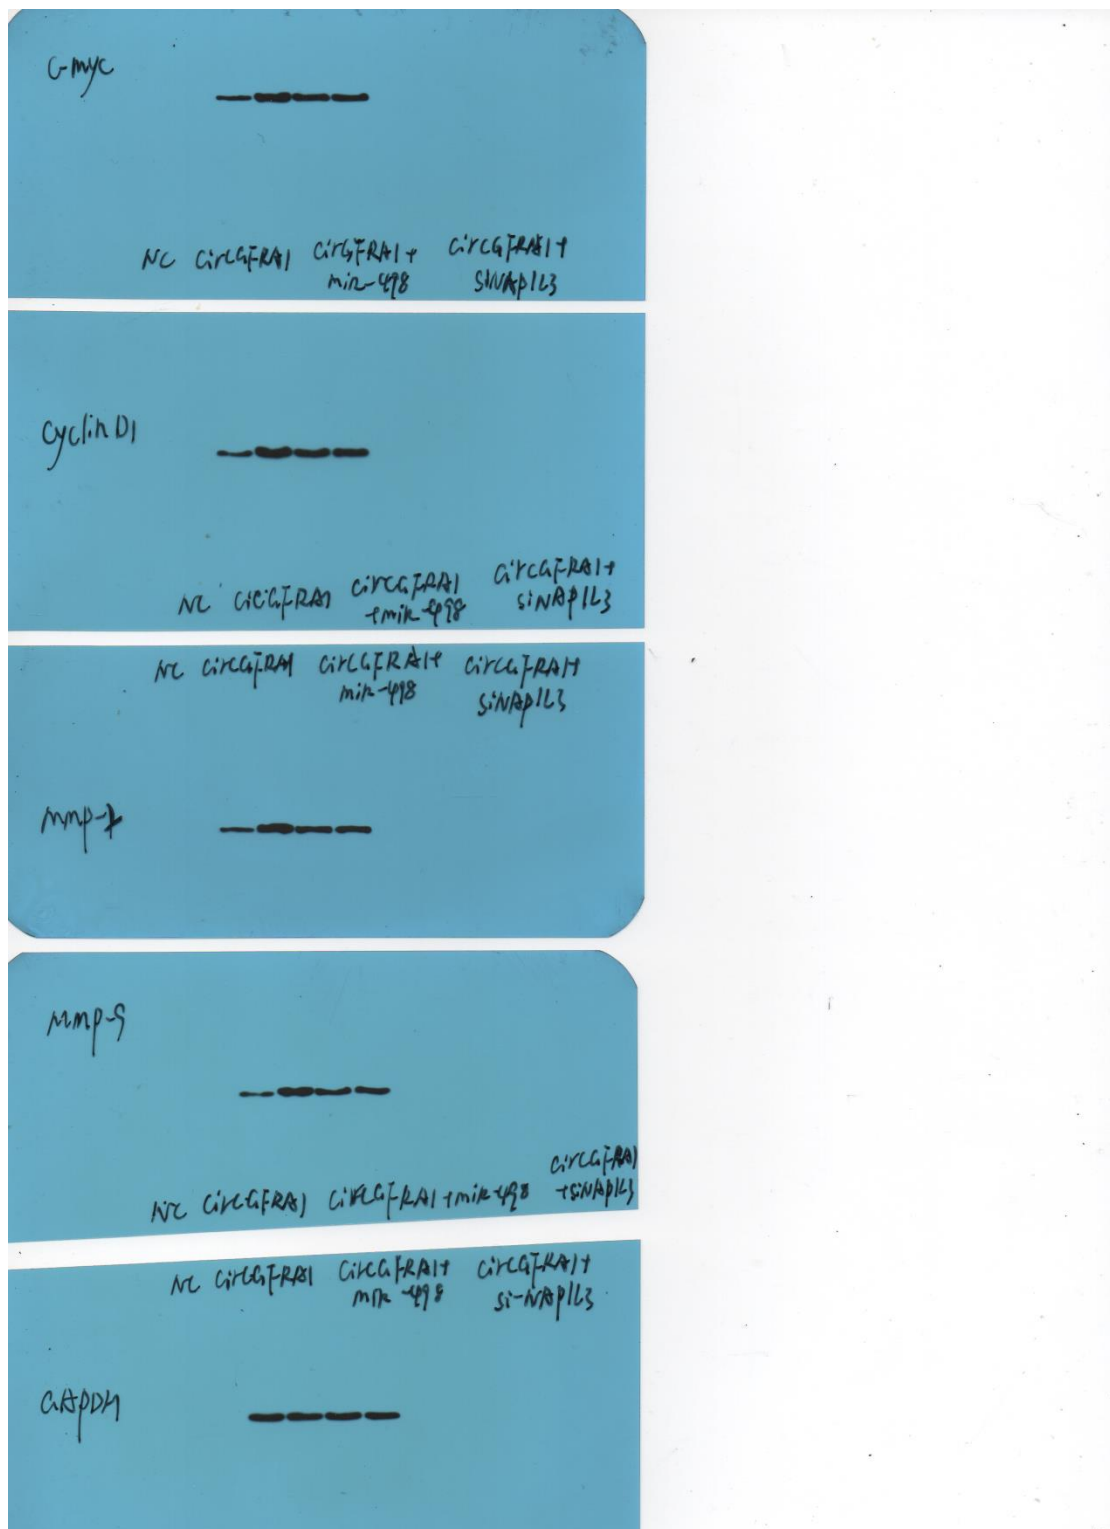

5、Figure 5B: HEP3B cell: NAP1L3、GAPDH

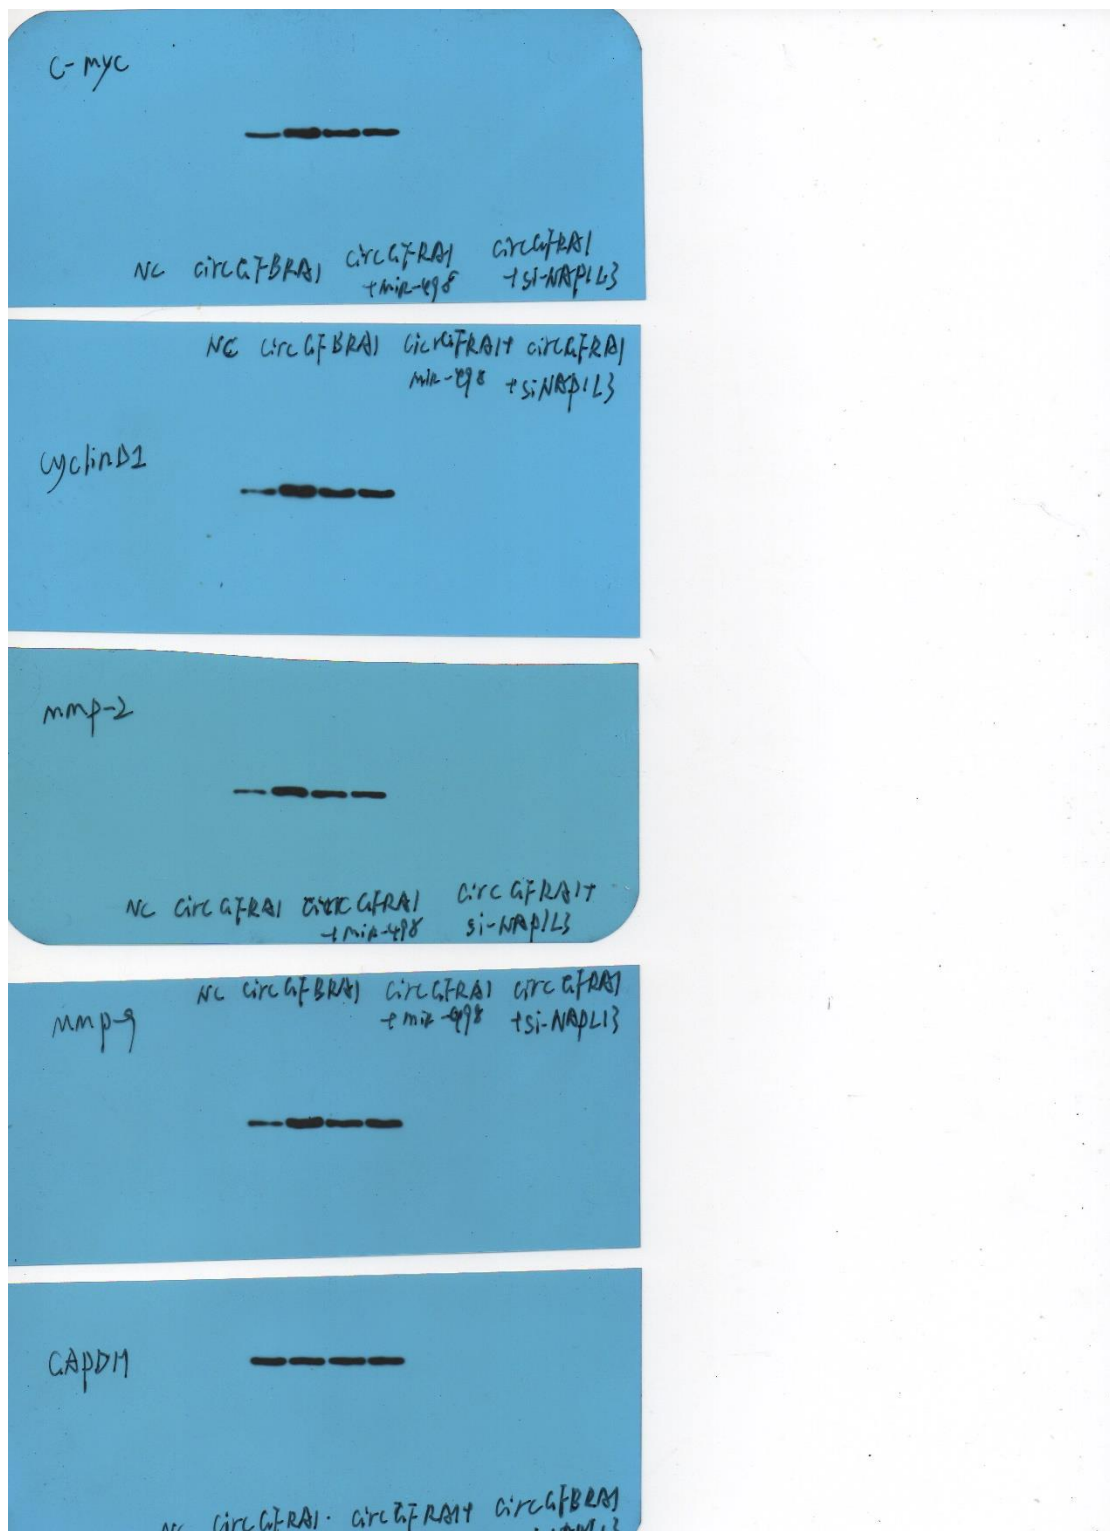

6. Figure 6D NAP1L3、GAPDH

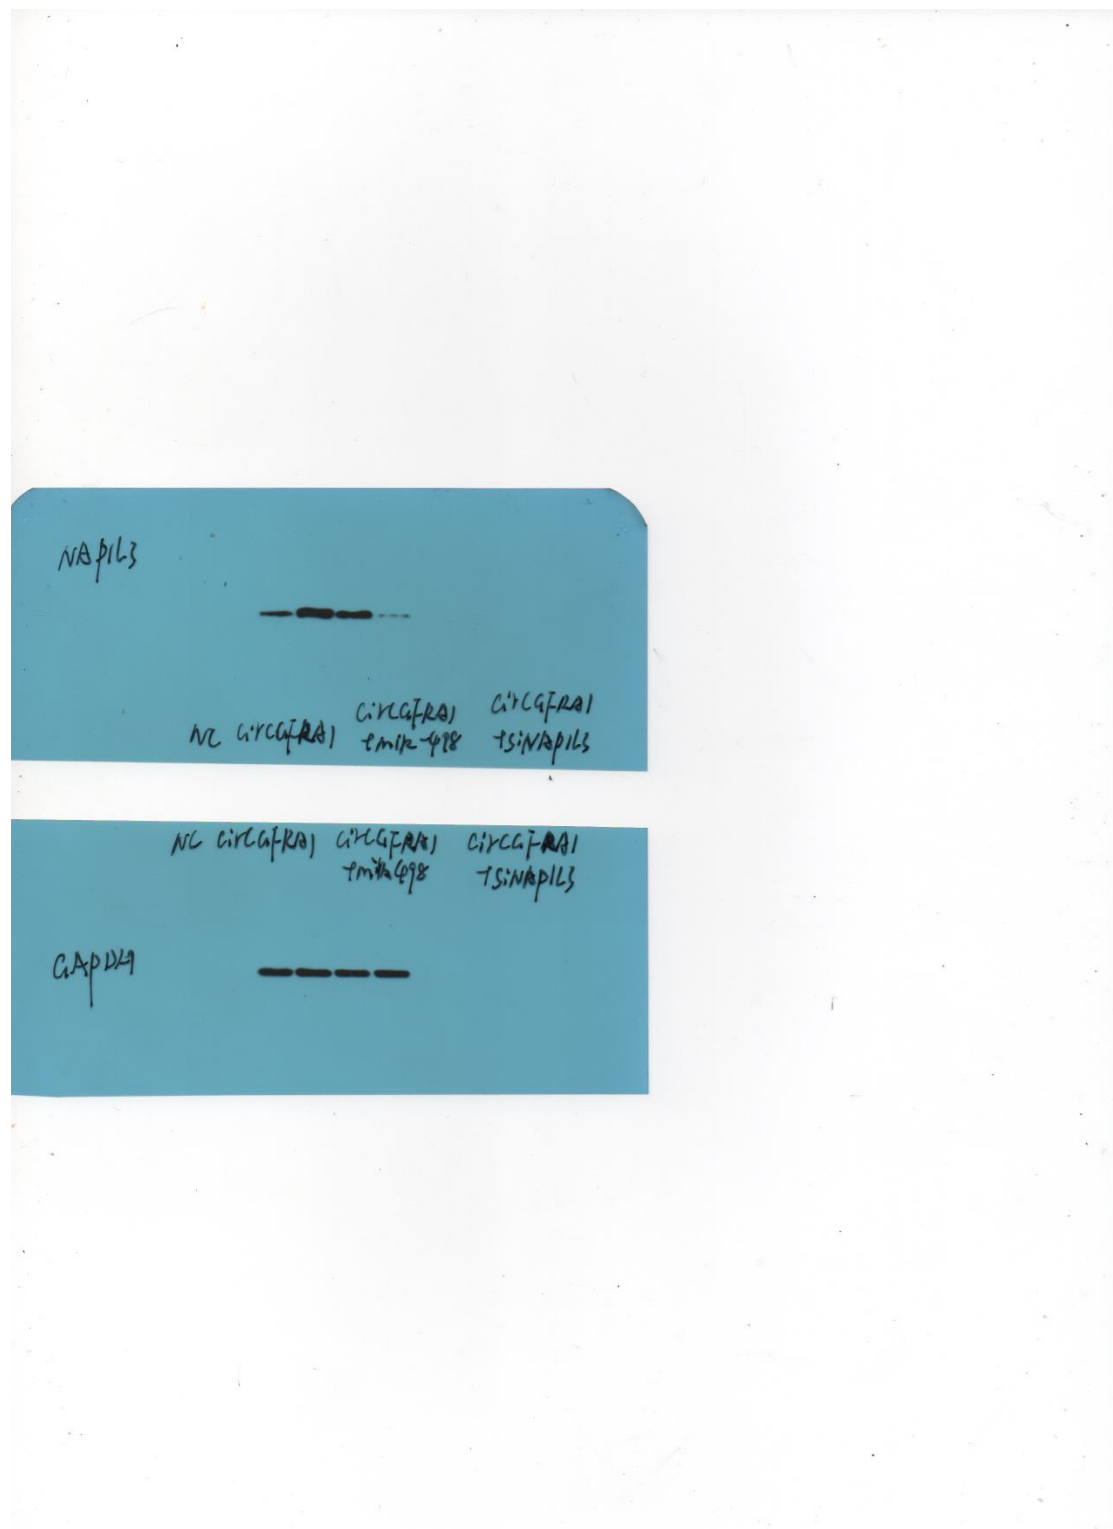

Supplement: 41598_2020_79321_MOESM1_ESM.pdf [file 41598_2020_79321_MOESM1_ESM.pdf]
